# Supplementary material for: Calving event size measurements and statistics of Eqip Sermia,Greenland, from terrestrial radar interferometry
Source: Copernicus journal article supplement (doi:10.5194/tc-2019-102), 2019-05-17
Supplement: Supplementary file 1 [file tc-2019-102-supplement.pdf]

Supplement

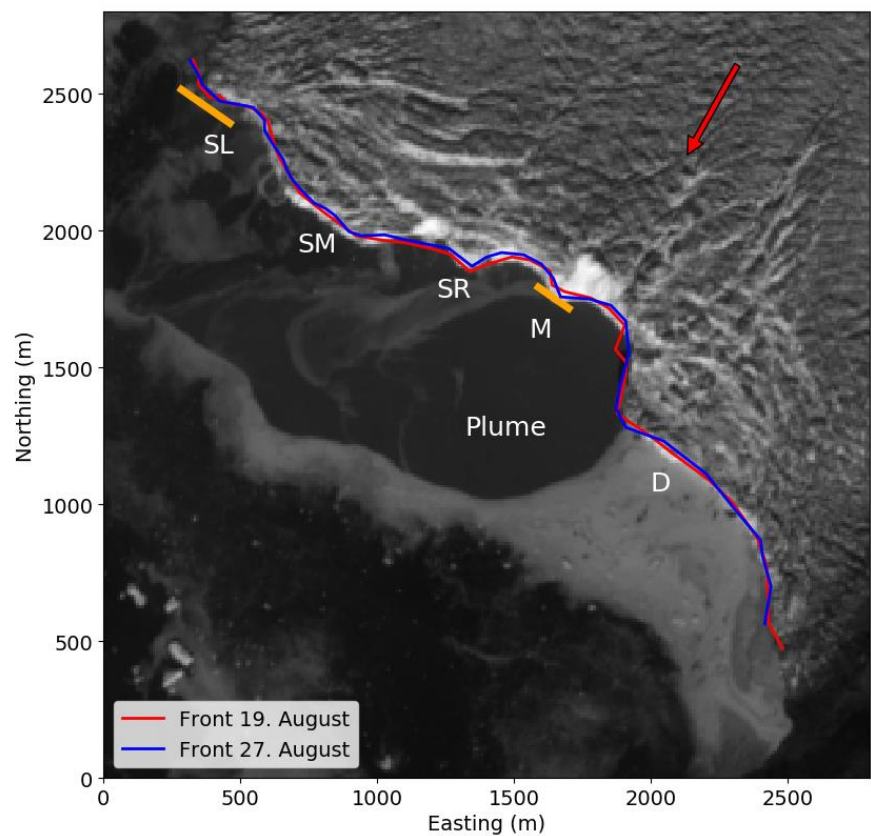

Figure S1: Front position at the beginning and the end of the observation period.

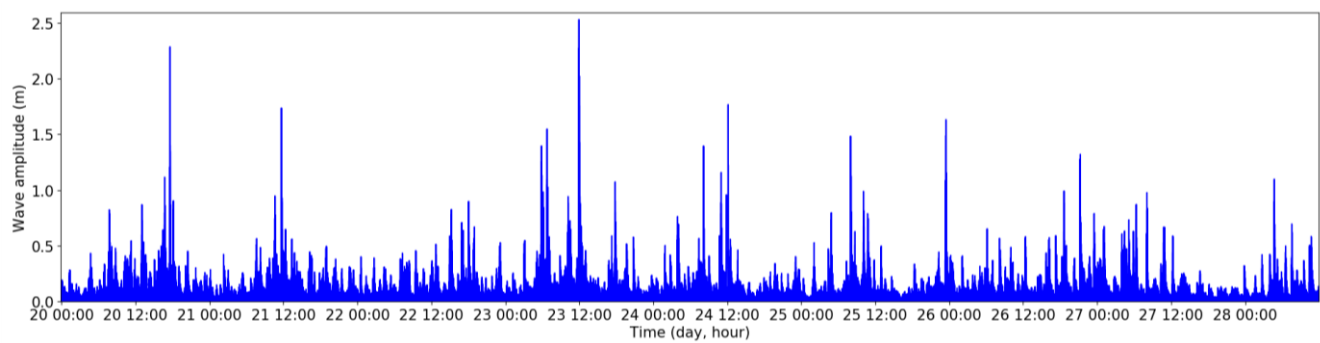

5 Figure S2: Calving waves detected with a pressure sensor during the observation period.

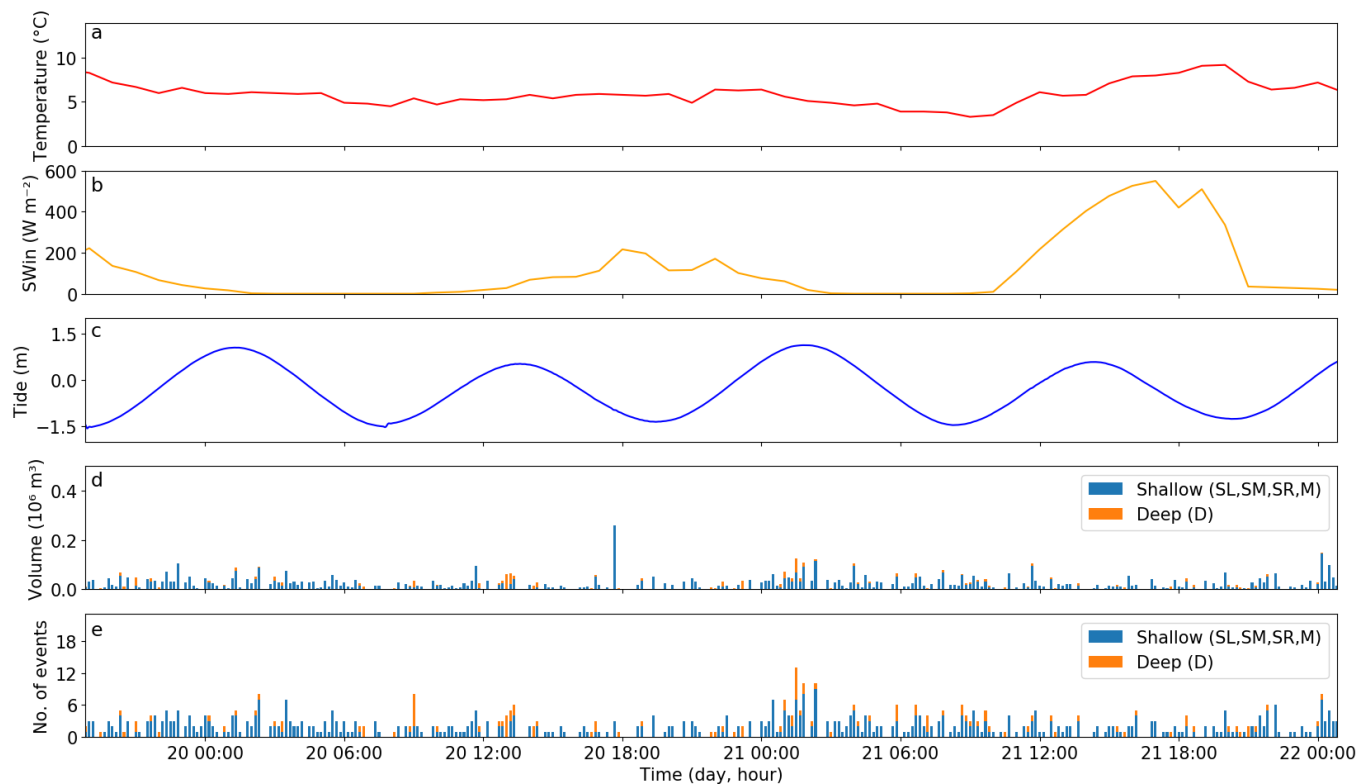

**Figure S3: Comparison of forcing to detected calving. (a) The air temperature from the AWS1 for the first part of the observation period. (b) The incoming shortwave radiation. (c) Tidal range in meters. (d) Volume of calving events in  $\text{m}^3$  for the shallow and deep sectors. (e) Number of calving events.**
